# Supplementary material for: MSF Enhances Human Antimicrobial Peptide β-Defensin (HBD2 and HBD3) Expression and Attenuates Inflammation via the NF-κB and p38 Signaling Pathways
Source: MDPI journal article supplement (doi:10.3390/molecules28062744), 2023-03-18
Supplement: s1 [file s1]

# MSF Enhances Human Antimicrobial Peptide $\beta$ -Defensin (HBD2 and HBD3) Expression and Attenuates Inflammation via the NF- $\kappa$ B and p38 Signaling Pathways

Anh-Thu Nguyen, Minh Kim, Ye-Eun Kim, Hangeun Kim, Sanghyun Lee, Yunji Lee and Ki-Young Kim

A

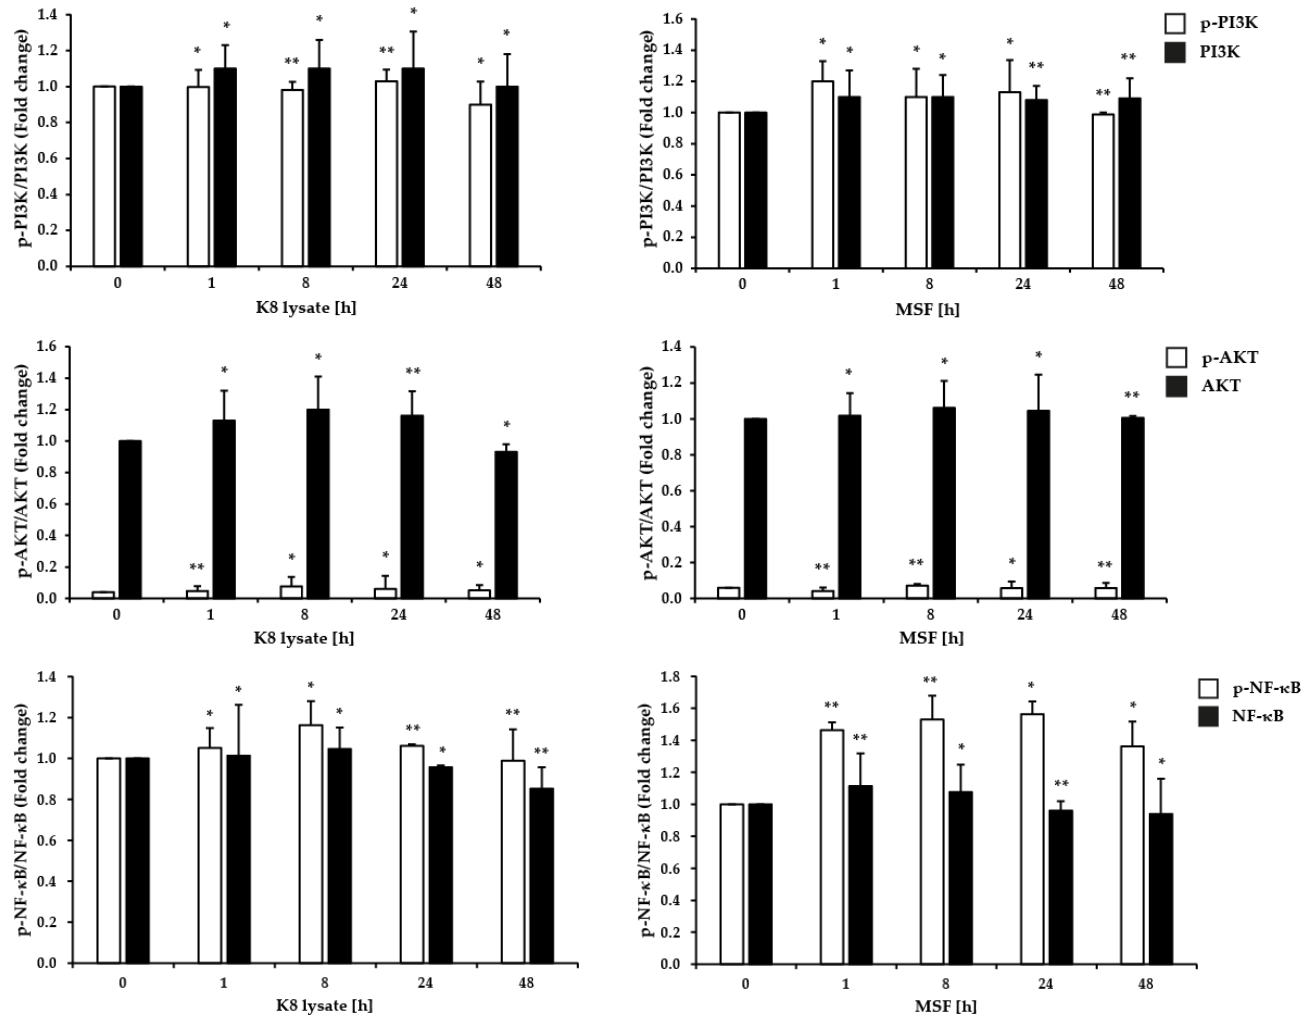

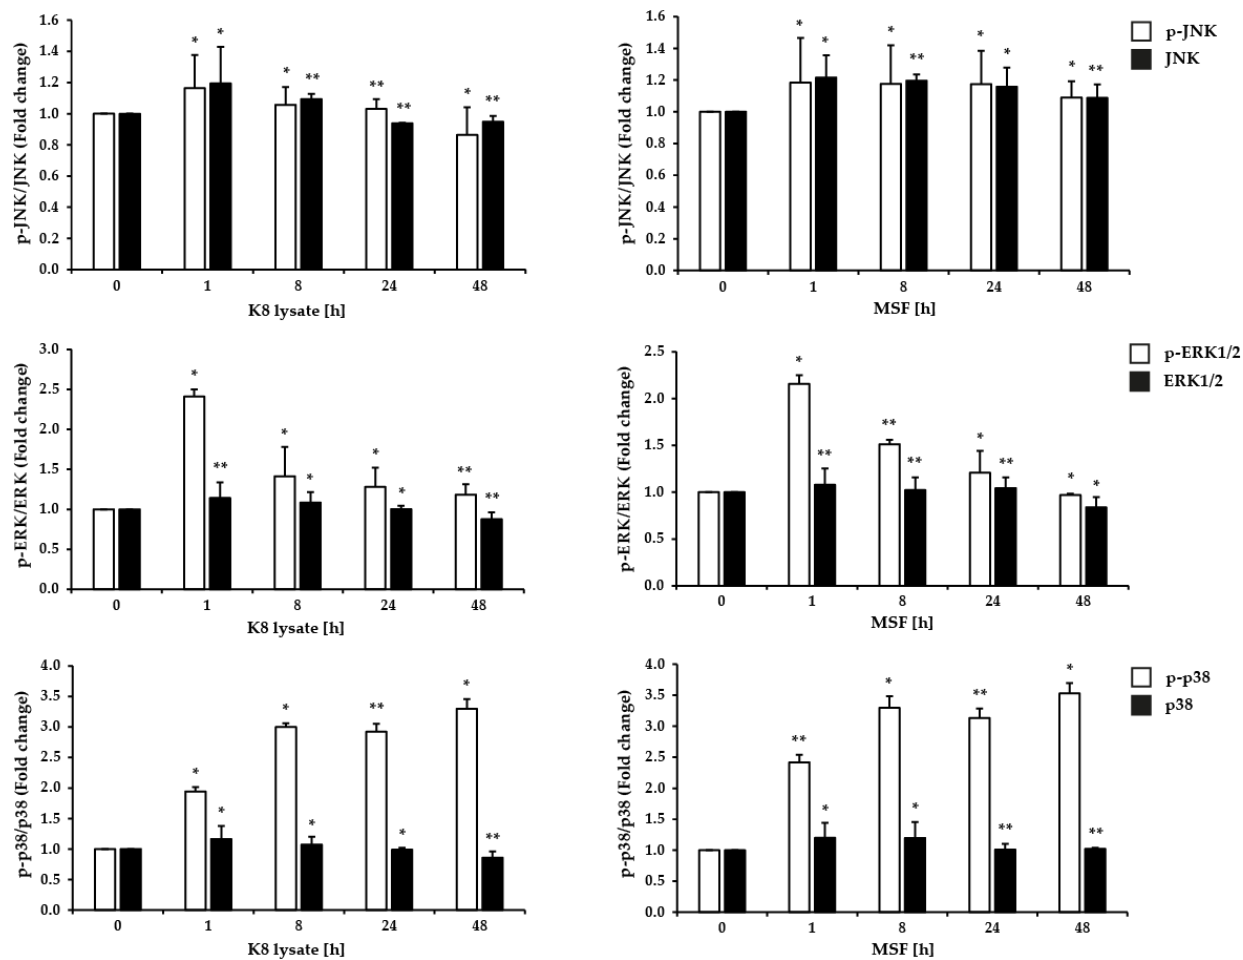

**B**

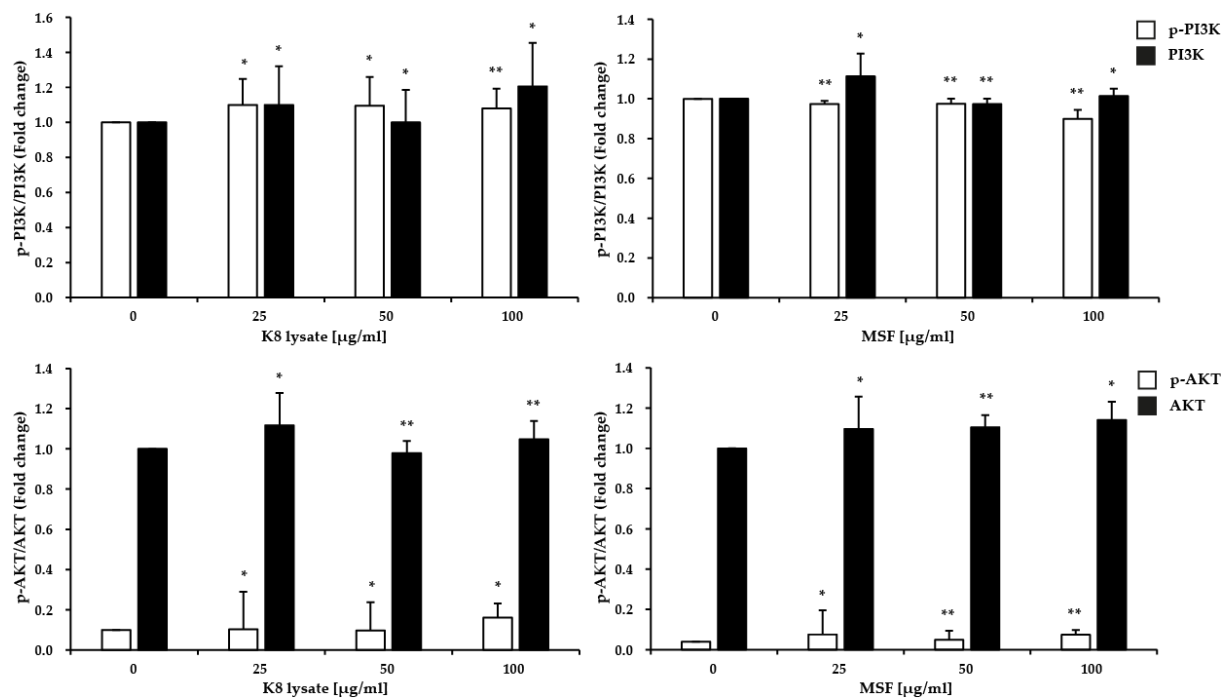

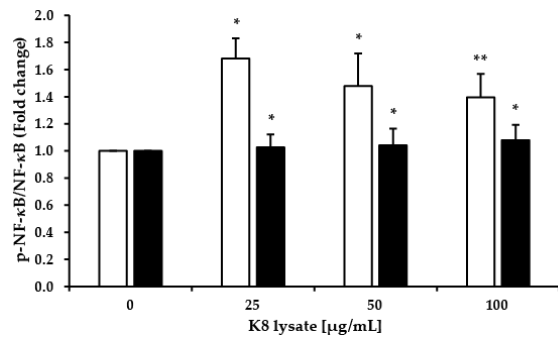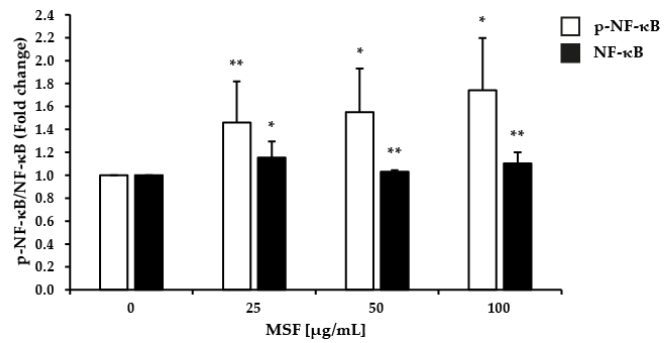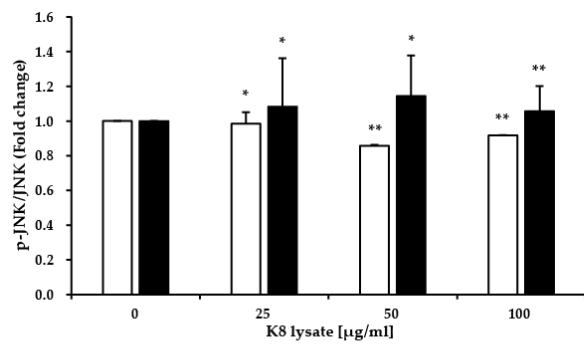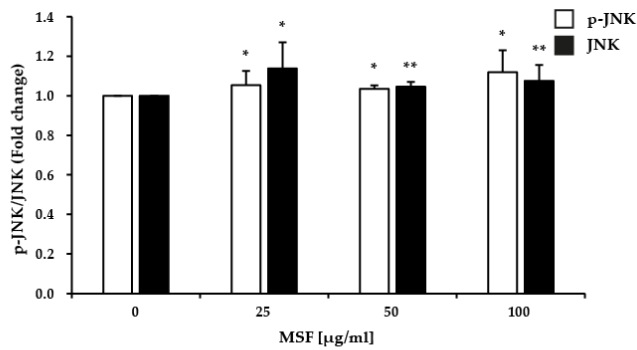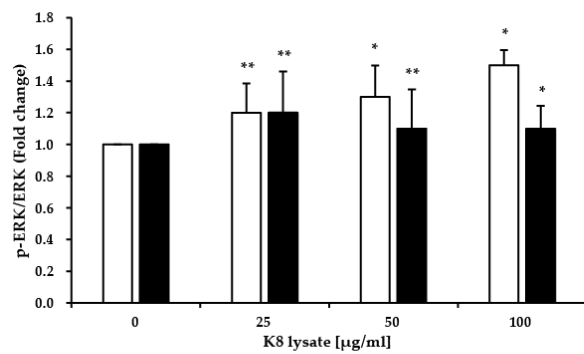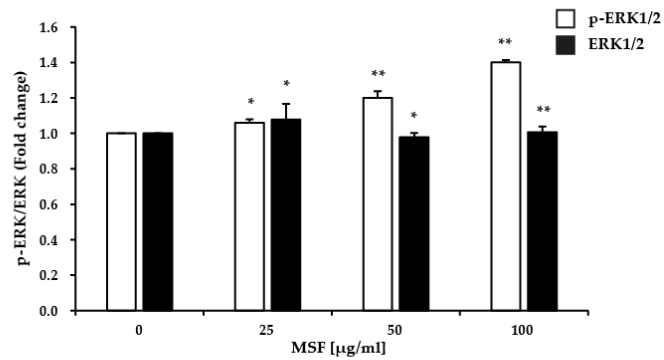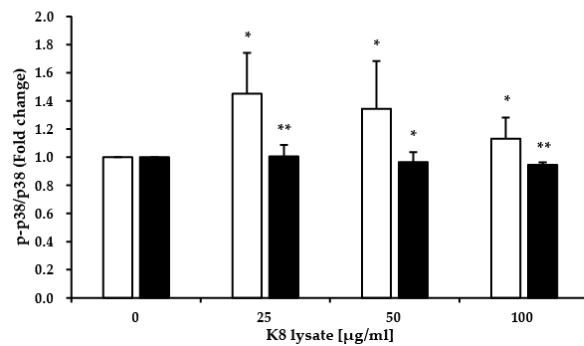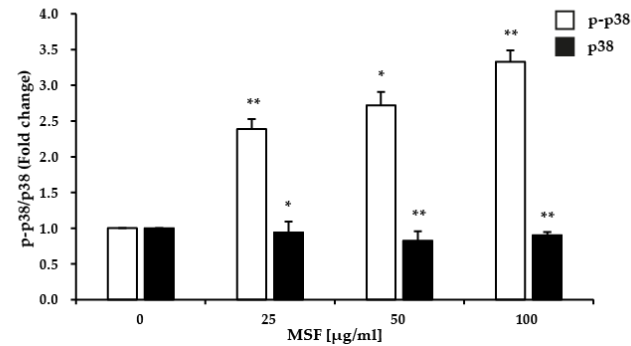

C

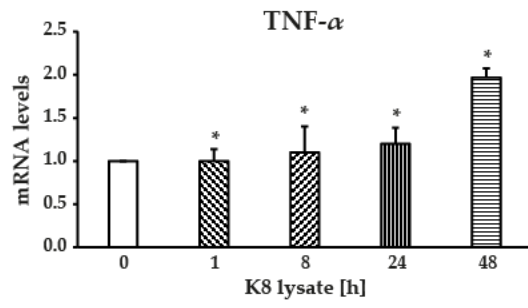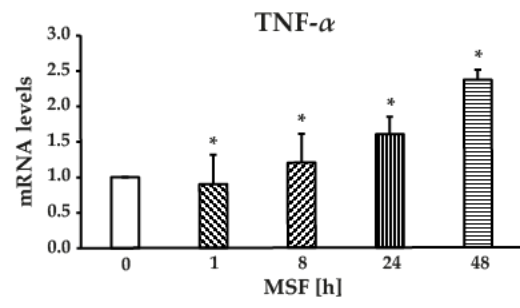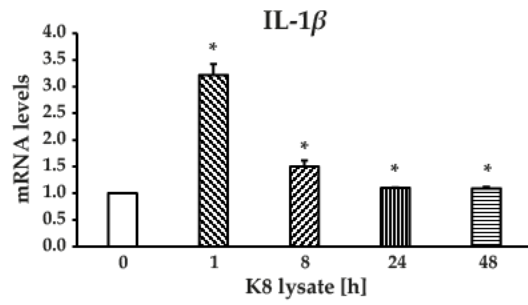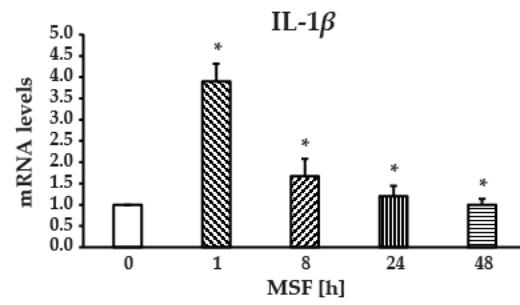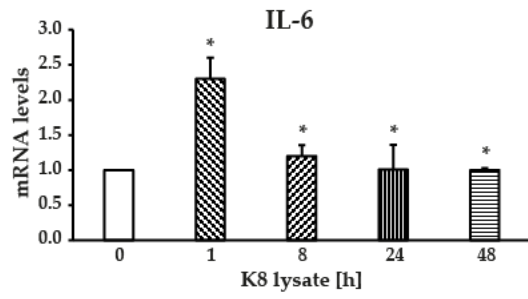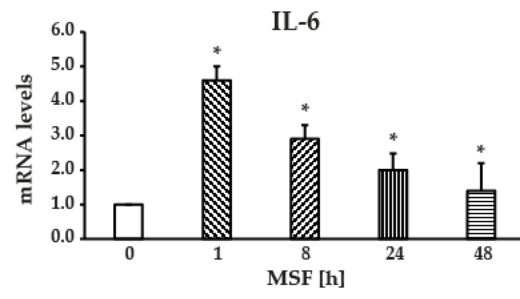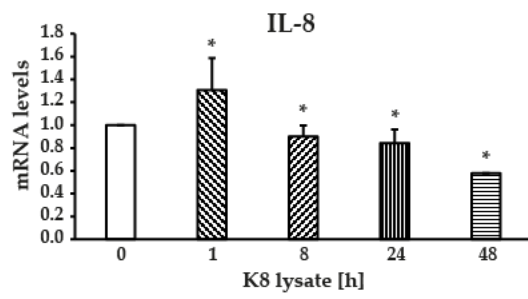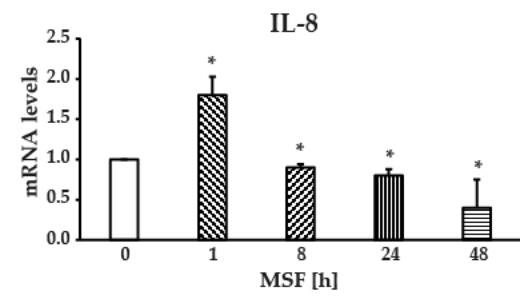

D

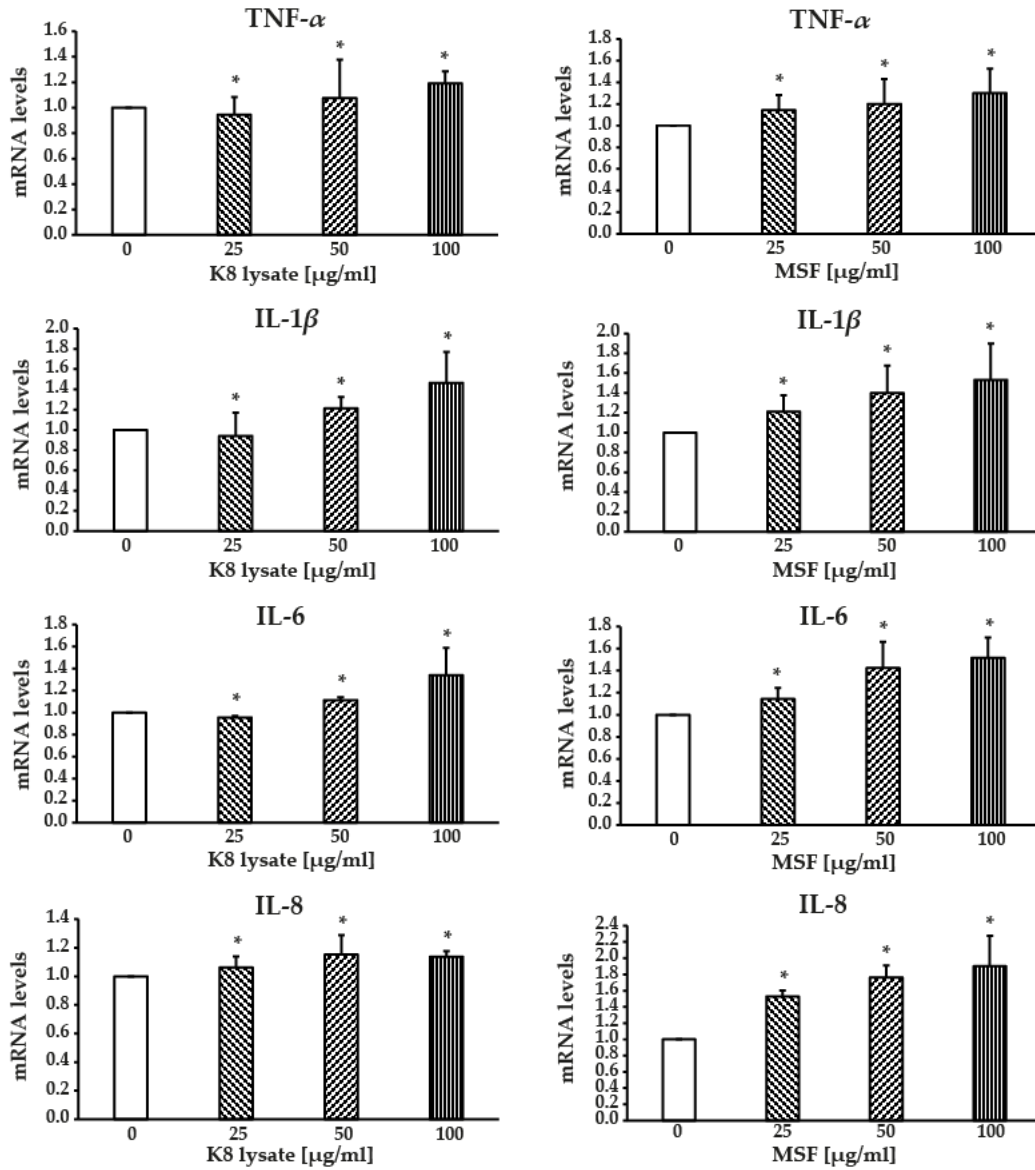

**Figure S1.** Effect of MSF treatment in PI3K, NF- $\kappa$ B, and MAPK signaling pathways. HaCaT cells were starved for 20 h before treatment of indicated concentration of MSF and K8 lysate for 1 h. (A and B) Western blot quantification of protein levels of PI3K, AKT, NF- $\kappa$ B, JNK, ERK1/2 and p38. (C and D) The mRNA expression of TNF- $\alpha$ , IL-1 $\beta$ , IL-6, and IL-8 by treatment of MSF and K8 lysate in a time- and dose- dependent manner. Values mean  $\pm$  SD with three independent experiments. \* $p < 0.05$ , \*\* $p < 0.01$ .

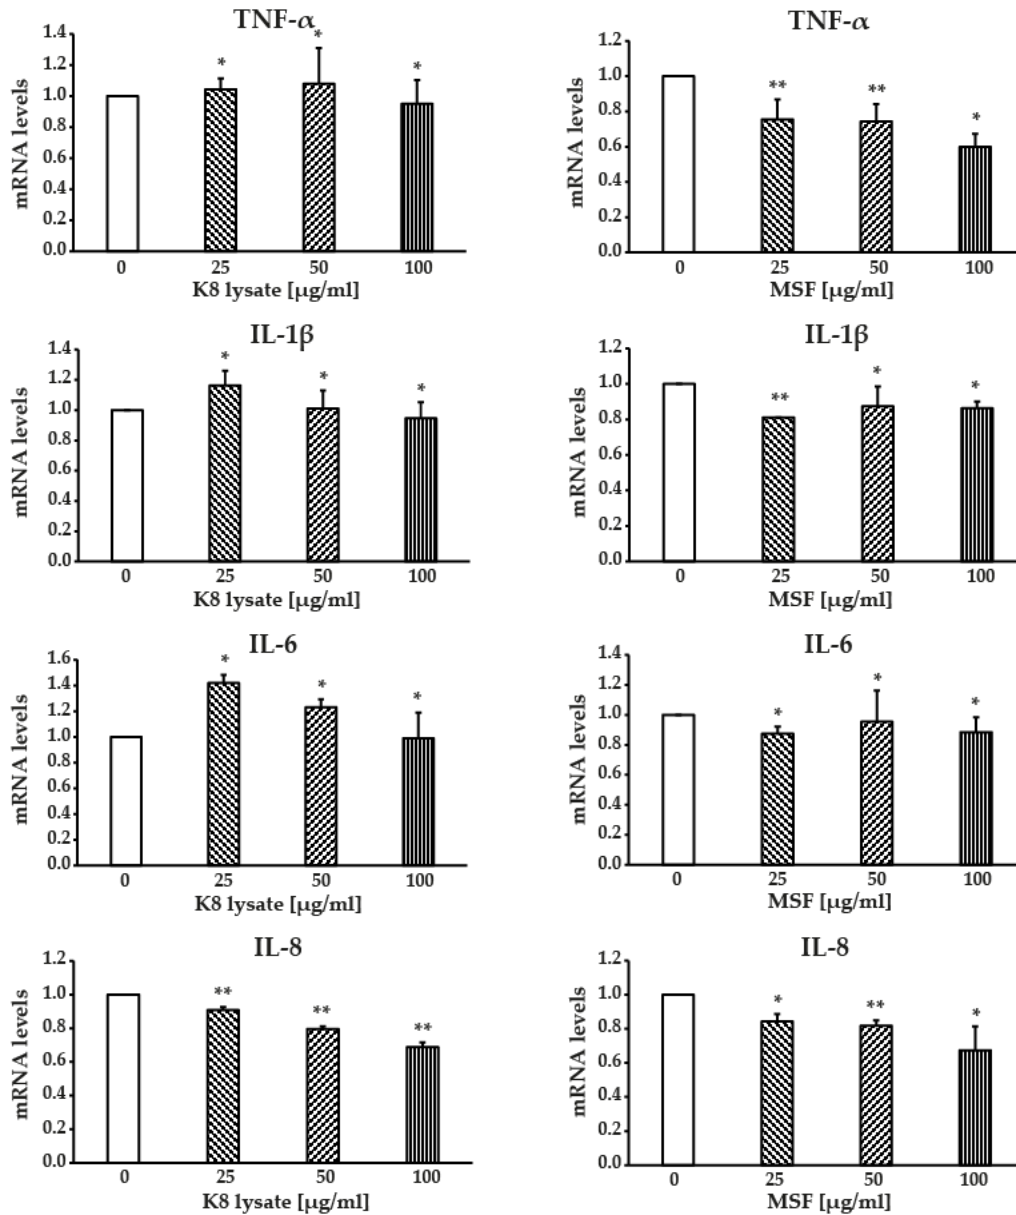

**Figure S2.** MSF treatment regulated the mRNA expression of pro-inflammatory cytokine genes via p38 signaling pathways. After 20 h starvation, cells were preincubated with SB203580, a specific inhibitor of p38, for 3 h and then treated indicated concentration of MSF for 1 h. The alteration of mRNA levels of TNF- $\alpha$ , IL-1 $\beta$ , IL-6 and IL-8 was analyzed using qRT-PCR. Values mean  $\pm$  SD with three independent experiments. \* $p < 0.05$ , \*\* $p < 0.01$ .

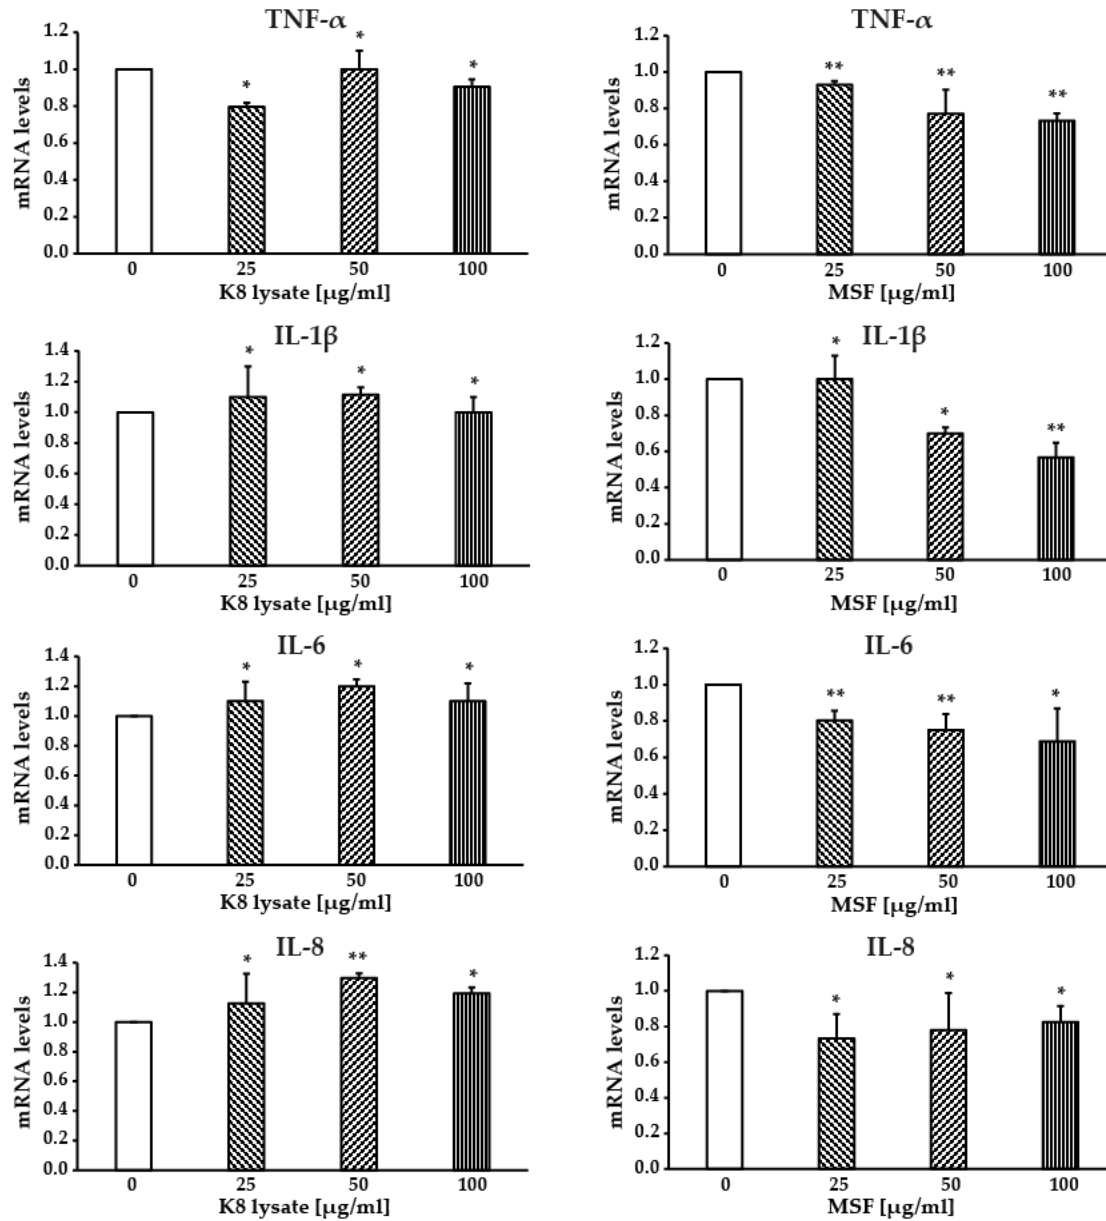

**Figure S3.** MSF regulated the expression of pro-inflammatory genes (TNF- $\alpha$ , IL-1 $\beta$ , IL-6 and IL-8) through NF- $\kappa$ B signaling pathways. HaCaT cells were starved for 20 h, and then were pre-treated with SP100030 (50  $\mu$ M) for 3 h. The indicated concentration (25, 50, and 100  $\mu$ g/ml) of MSF and K8 lysate were treated for 1 h. The expressions of TNF- $\alpha$ , IL-1 $\beta$ , IL-6 and IL-8 was checked by qRT-PCR. Values mean  $\pm$  SD with three independent experiments. \* $p$  < 0.05, \*\* $p$  < 0.01.

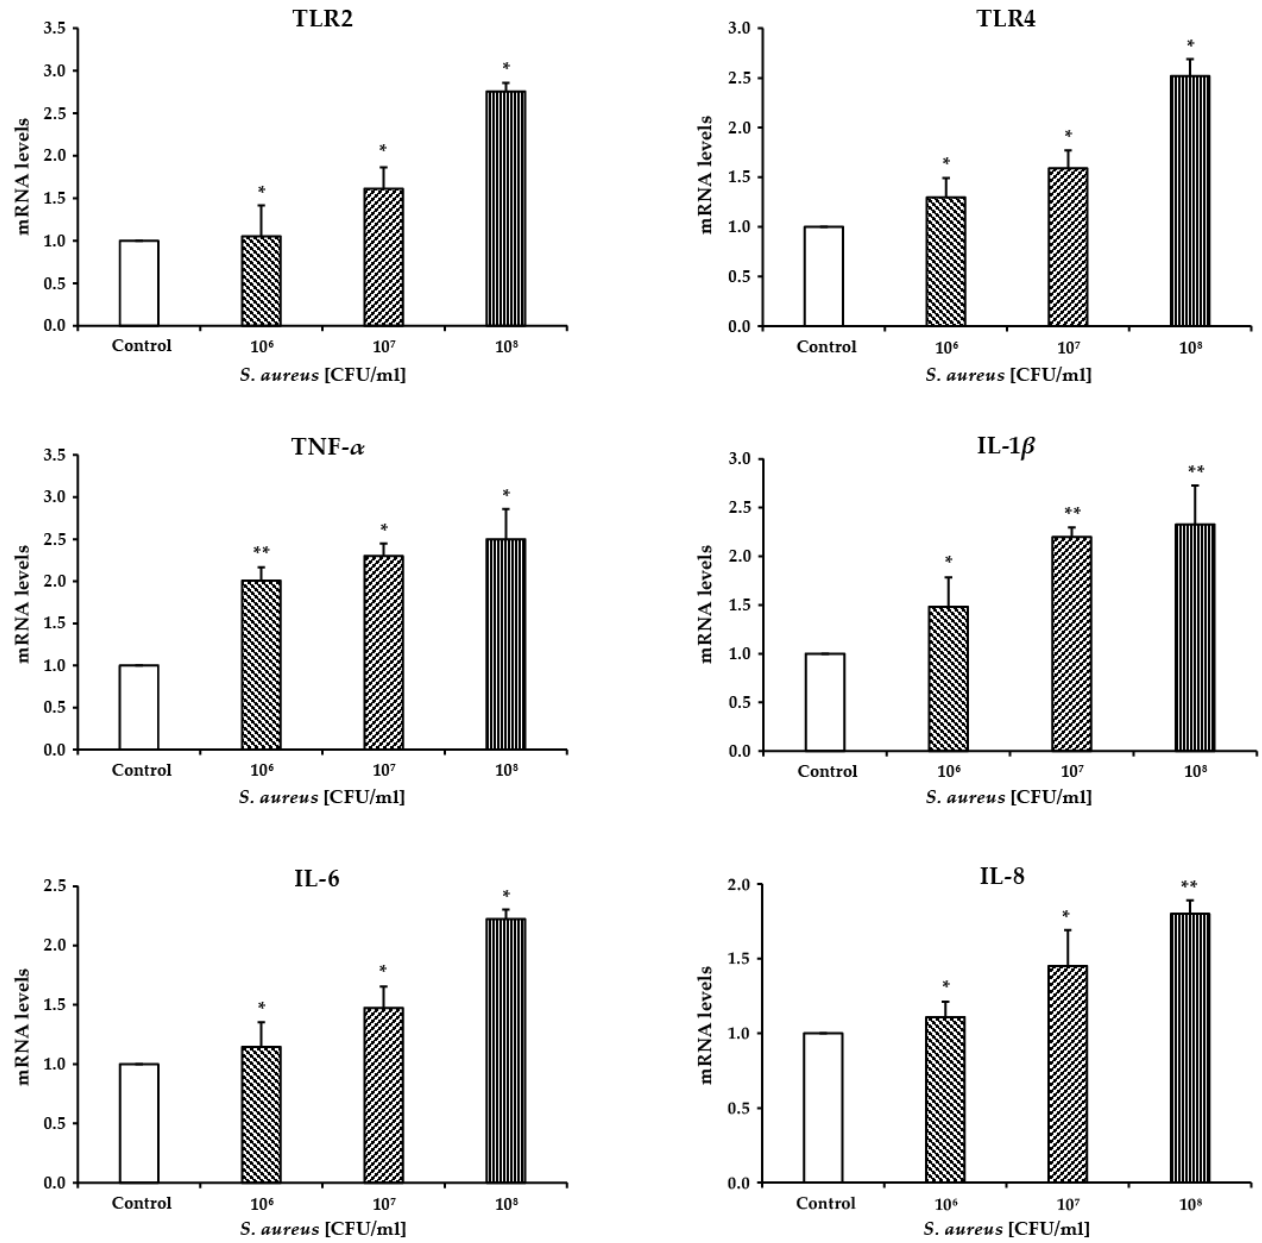

**Figure S4.** *S. aureus* increased the expression of TLR2, TLR4 and pro-inflammatory cytokines. Heat-killed *S. aureus* was treated to THP1 cells for 24 h. qRT-PCR was used to check the expression of TLR2, TLR4 and pro-inflammatory cytokines (TNF- $\alpha$ , IL-1 $\beta$ , IL-6 and IL-8). Values mean  $\pm$  SD with three independent experiments. \* $p < 0.05$ , \*\* $p < 0.01$ .



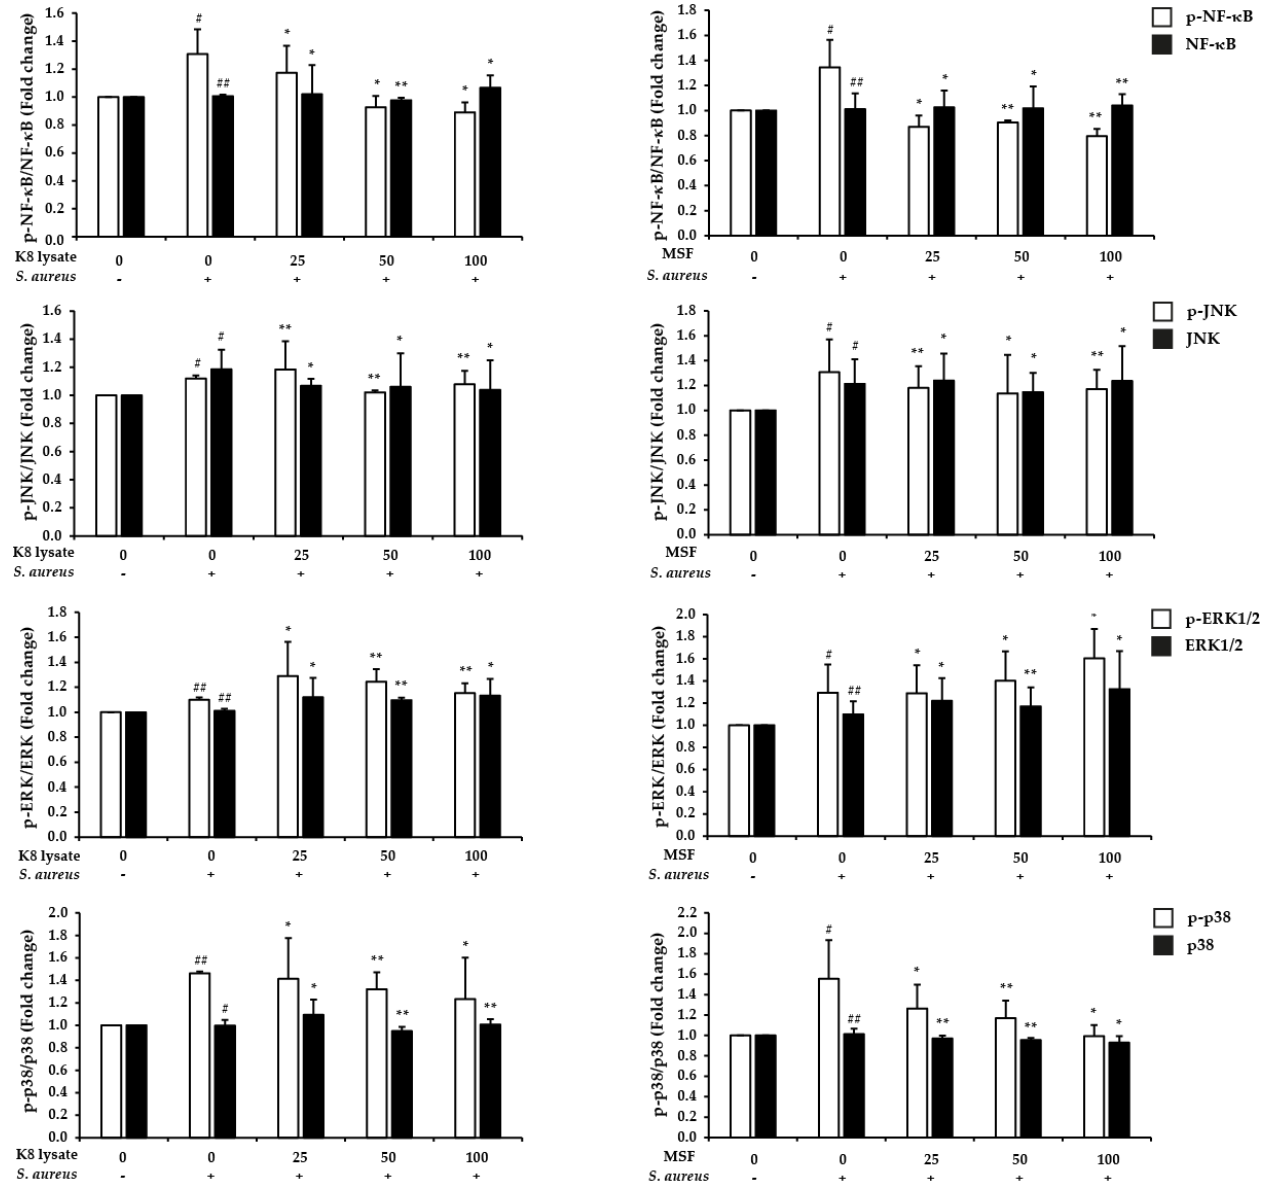

**Figure S5.** MSF treatment suppressed the *S. aureus*-induced inflammation in THP1 through NF- $\kappa$ B and p38 signaling pathways. THP1 cells were pre-treated for 1 h with the indicated concentration of MSF and K8 lysate and incubated with heat-killed *S. aureus* for 24 h. ImageJ was used to get the quantification results of western blot analysis. <sup>##</sup> $p < 0.01$ , <sup>###</sup> $p < 0.001$  vs. control. <sup>\*</sup> $p < 0.05$ , <sup>\*\*</sup> $p < 0.01$  vs. model.

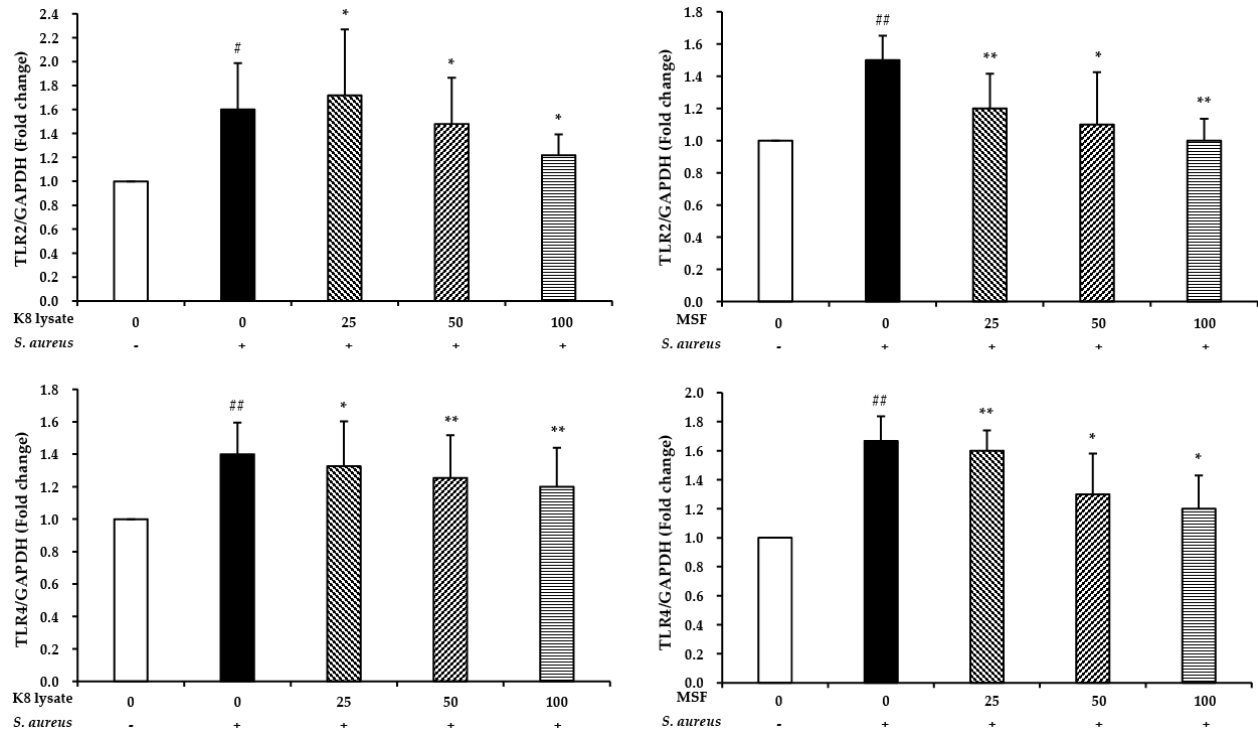

**Figure S6.** MSF treatment influenced the expression of TLR2 and TLR4. ImageJ was used to get the western blot quantification from western blot manner. ## $p < 0.01$ , ### $p < 0.001$  vs. control. \* $p < 0.05$ , \*\* $p < 0.01$  vs. model.
